# Supplementary material for: Pyrrolic tripodal receptors for carbohydrates. Role of functional groups and binding geometry on carbohydrate recognition
Source: Royal Society of Chemistry journal article supplement (doi:10.1039/c0ob00651c), 2010-12-13
Supplement: c0ob00651c.pdf [file c0ob00651c.pdf]

# **Pyrrolic tripodal receptors for carbohydrates. Role of functional groups and binding geometry on carbohydrate recognition.**

*Martina Cacciarini,\*<sup>a</sup> Cristina Nativi,<sup>a,b</sup> Martina Norcini,<sup>a</sup> Samuele Staderini,<sup>a</sup> Oscar Francesconi,<sup>a</sup> and Stefano Roelens\*<sup>c</sup>*

## **SUPPORTING INFORMATION**

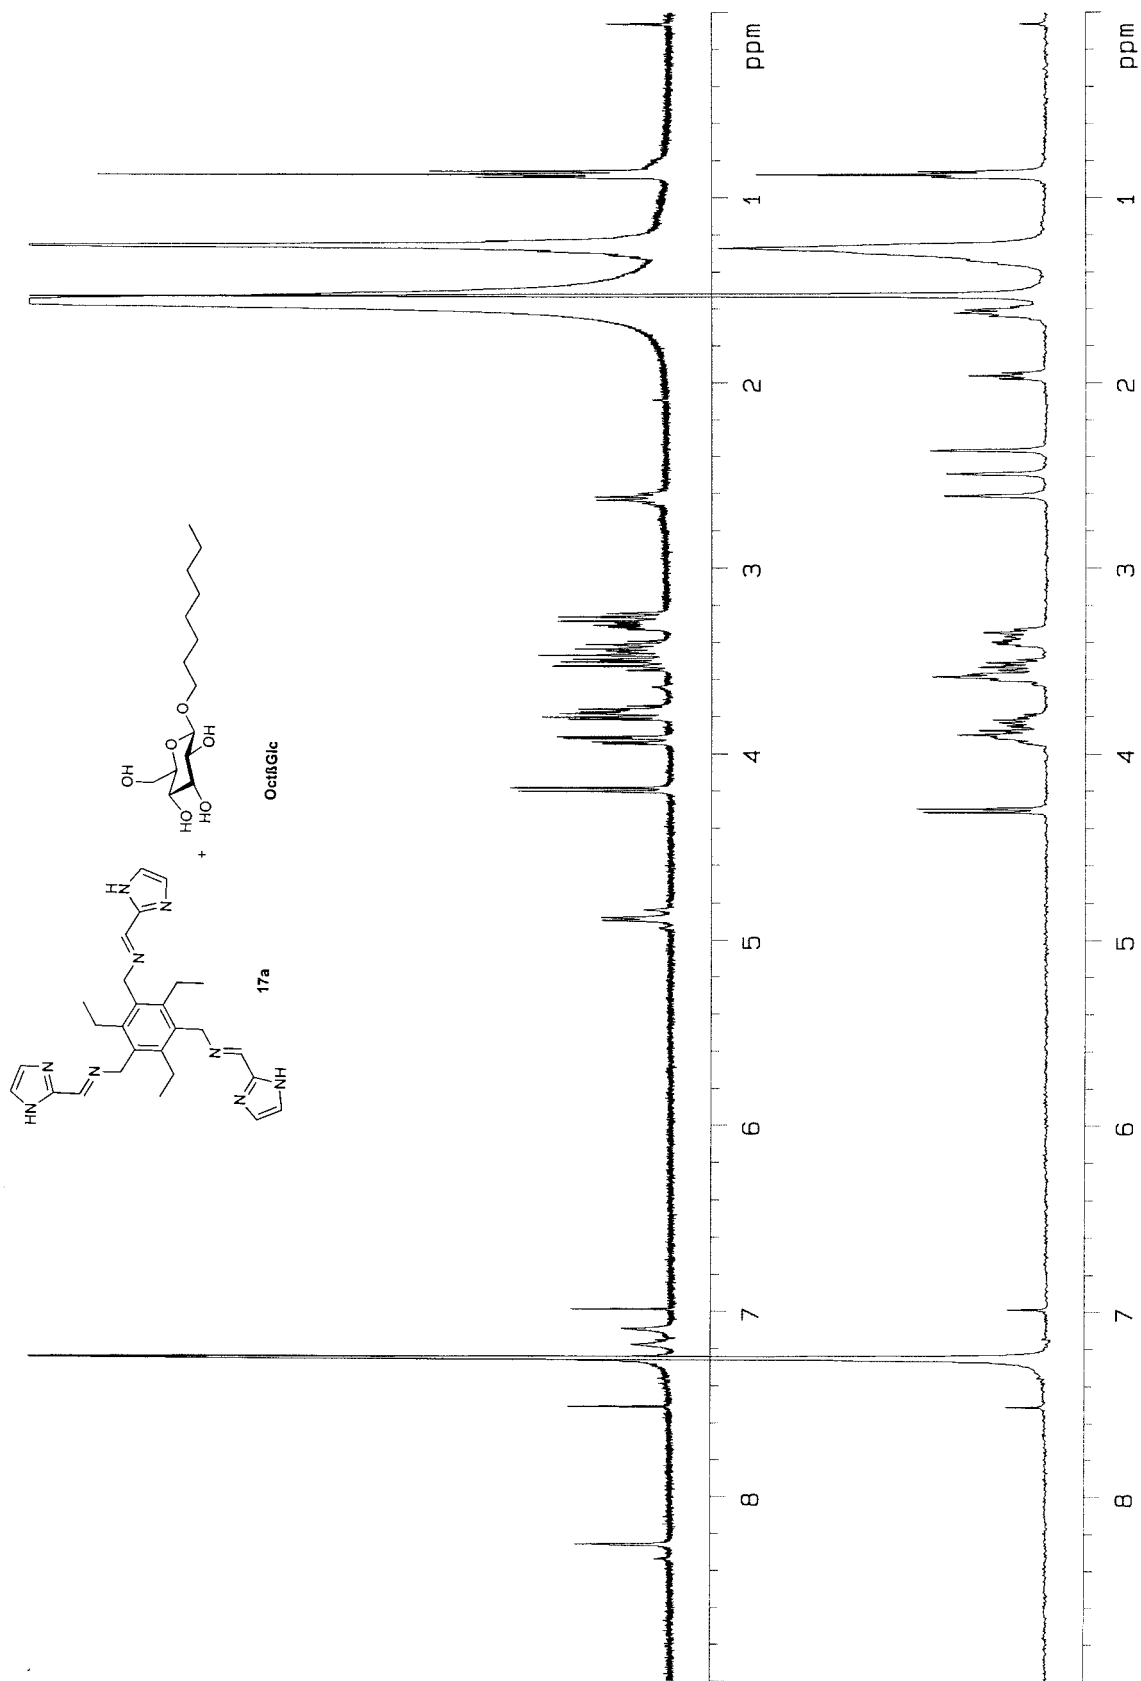

**Figure S1:** *Top:* <sup>1</sup>H-NMR spectrum at 400 MHz in CDCl<sub>3</sub> of OctβGlc with **17a**; *bottom:* <sup>1</sup>H-NMR spectrum at 400 MHz in CDCl<sub>3</sub> of OctβGlc.



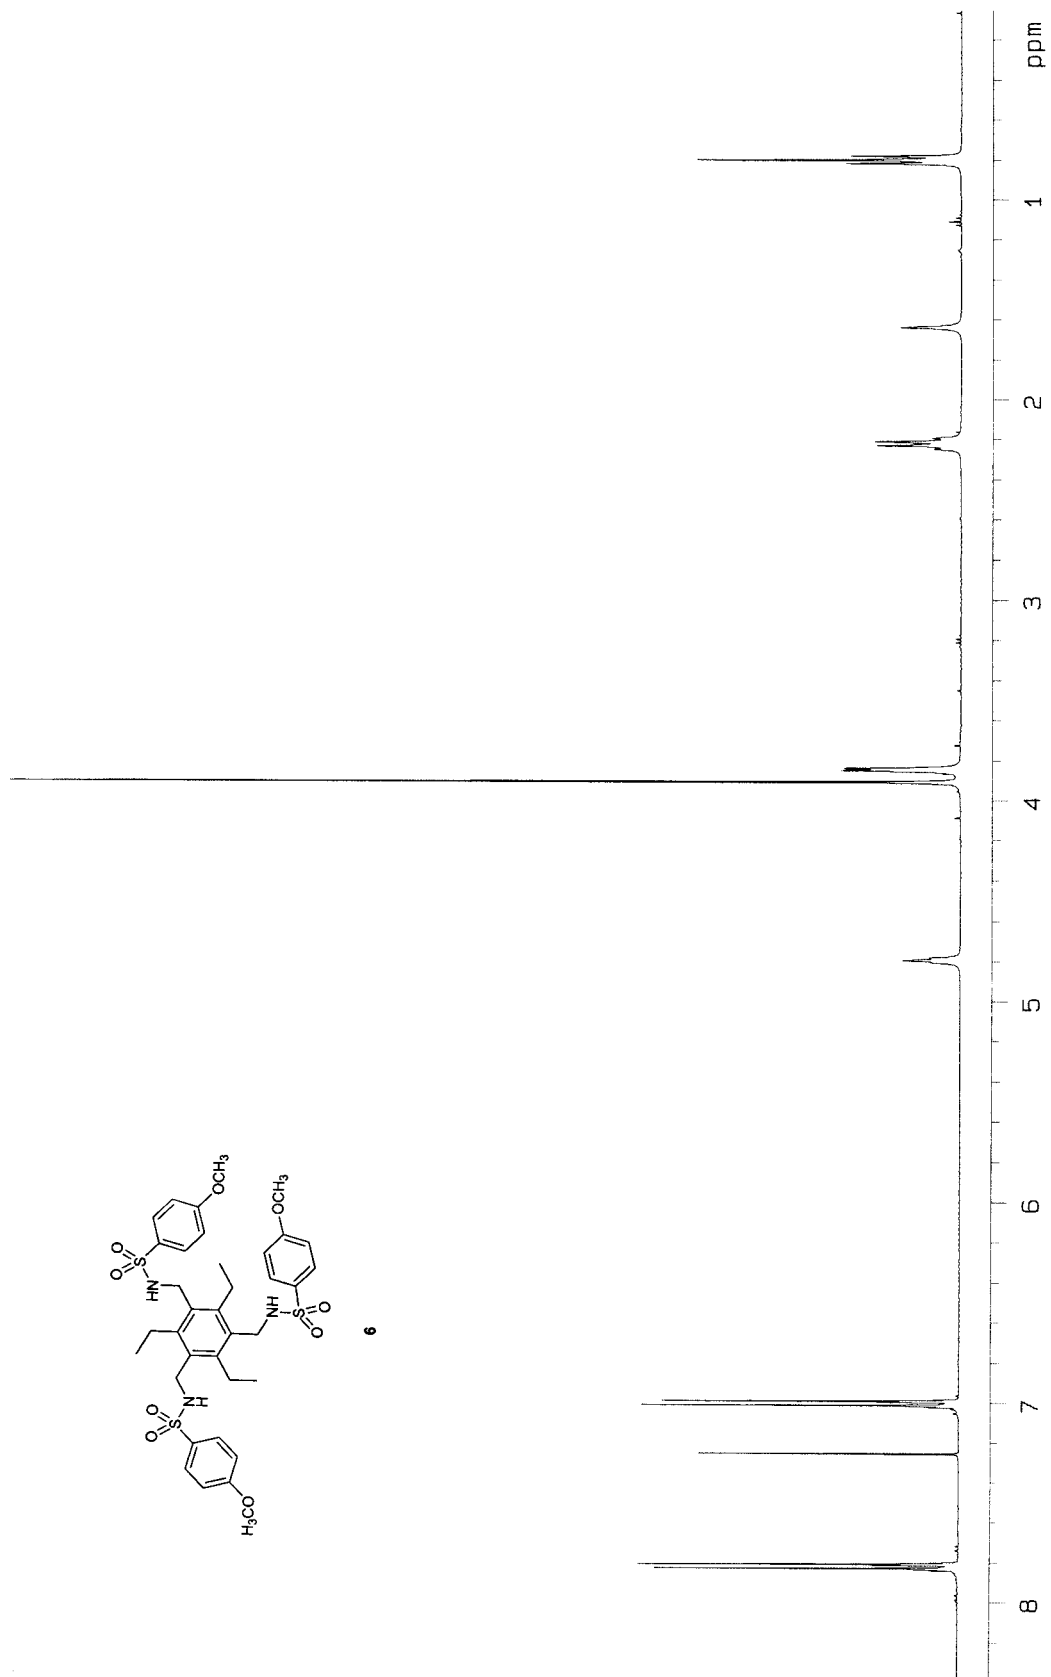

**Figure S3:** <sup>1</sup>H-NMR spectrum (400 MHz) of **6**, 20 mM in CDCl<sub>3</sub>

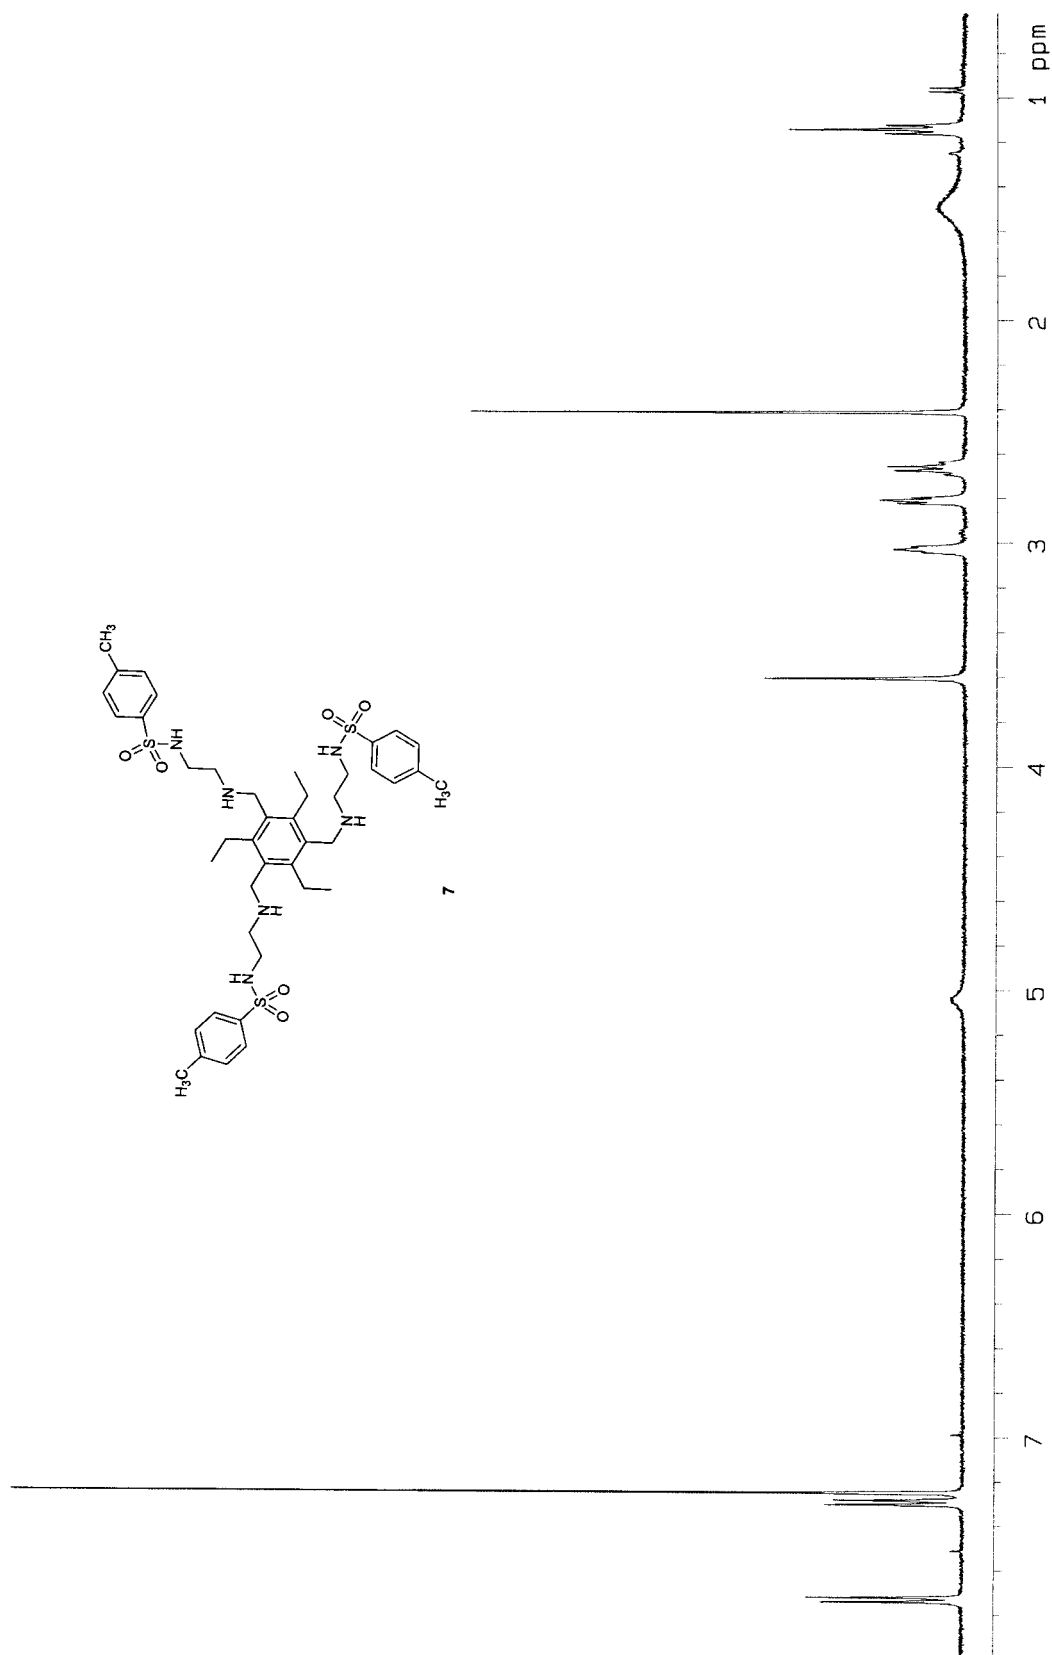

**Figure S4:** <sup>1</sup>H-NMR spectrum (400 MHz) of **7**, 1.4 mM in CDCl<sub>3</sub>

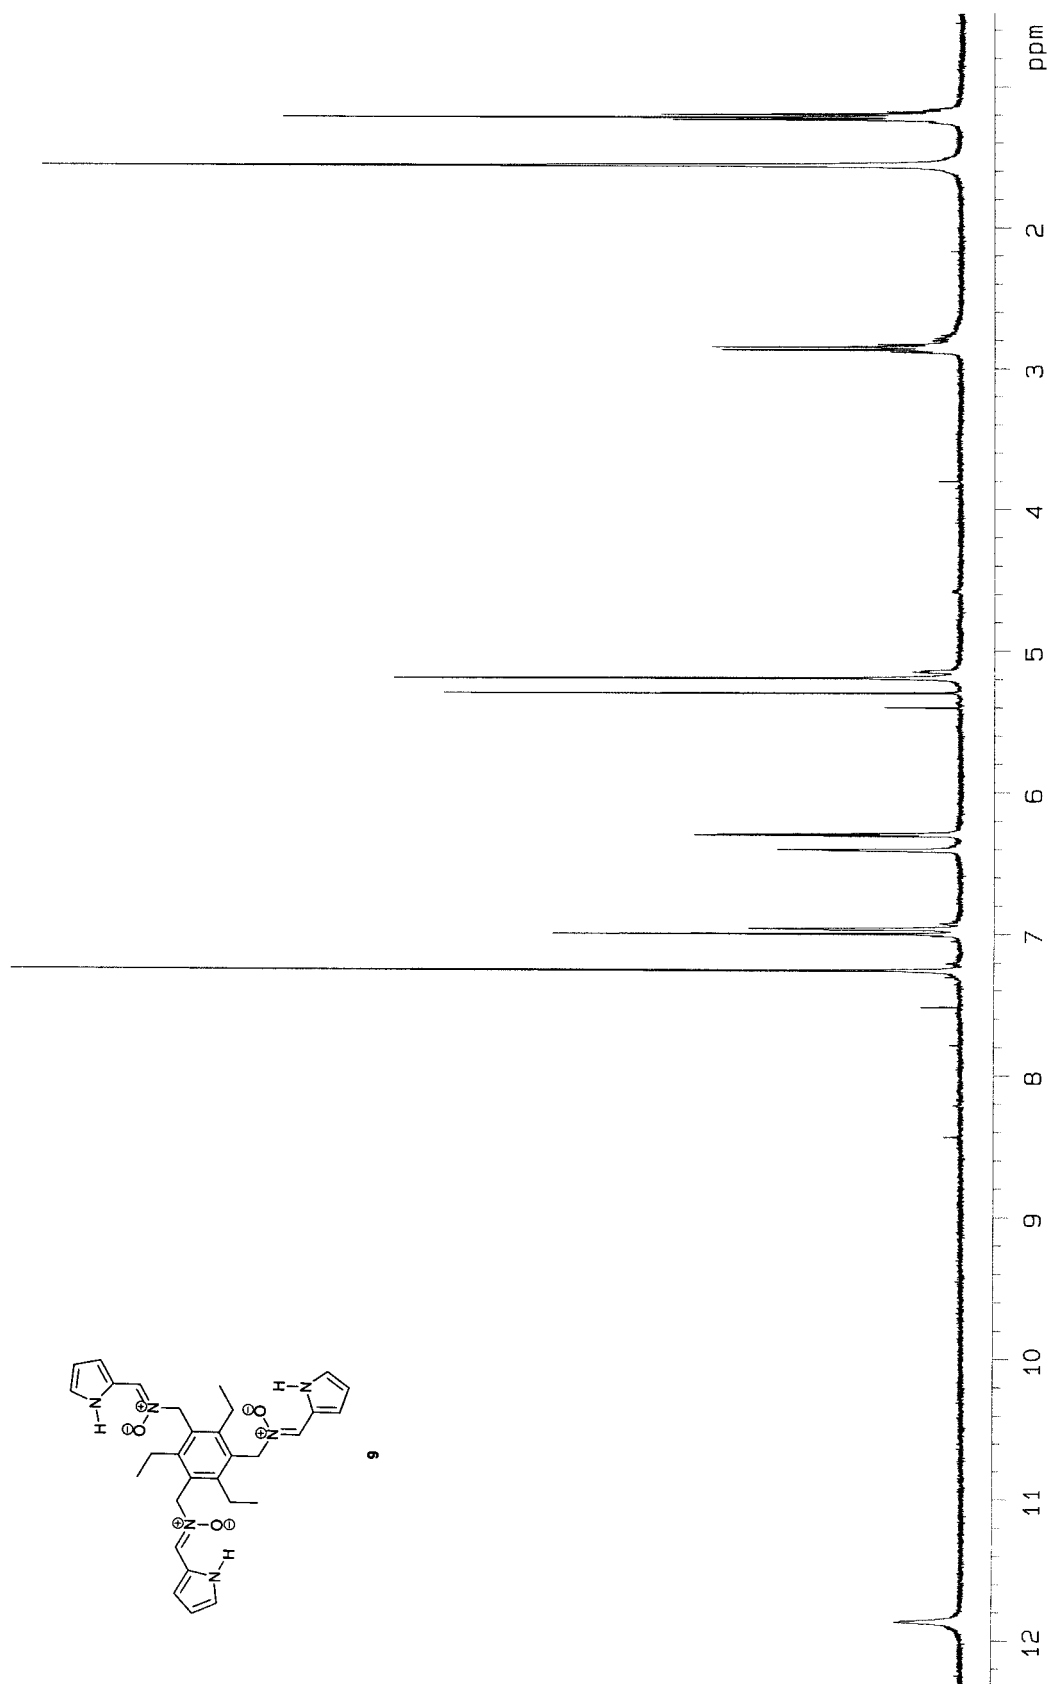

**Figure S5:**  $^1\text{H-NMR}$  spectrum (400 MHz) of **9** in  $\text{CDCl}_3$

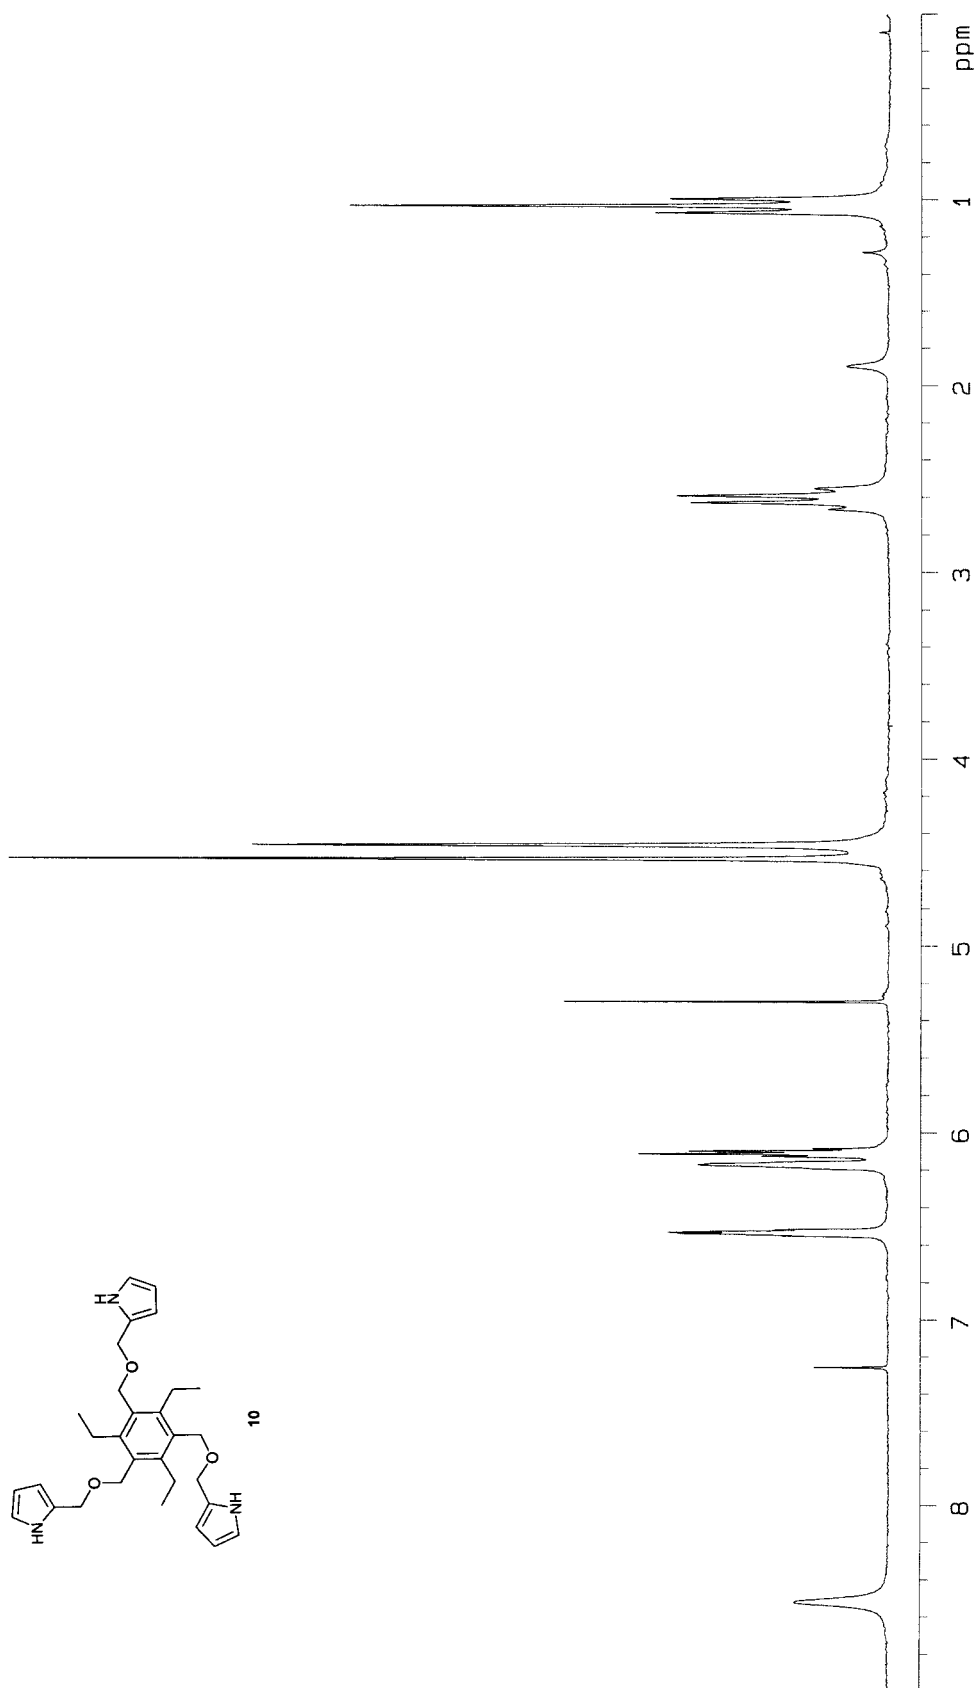

**Figure S6:** <sup>1</sup>H-NMR spectrum (200 MHz) of **10** in CDCl<sub>3</sub>

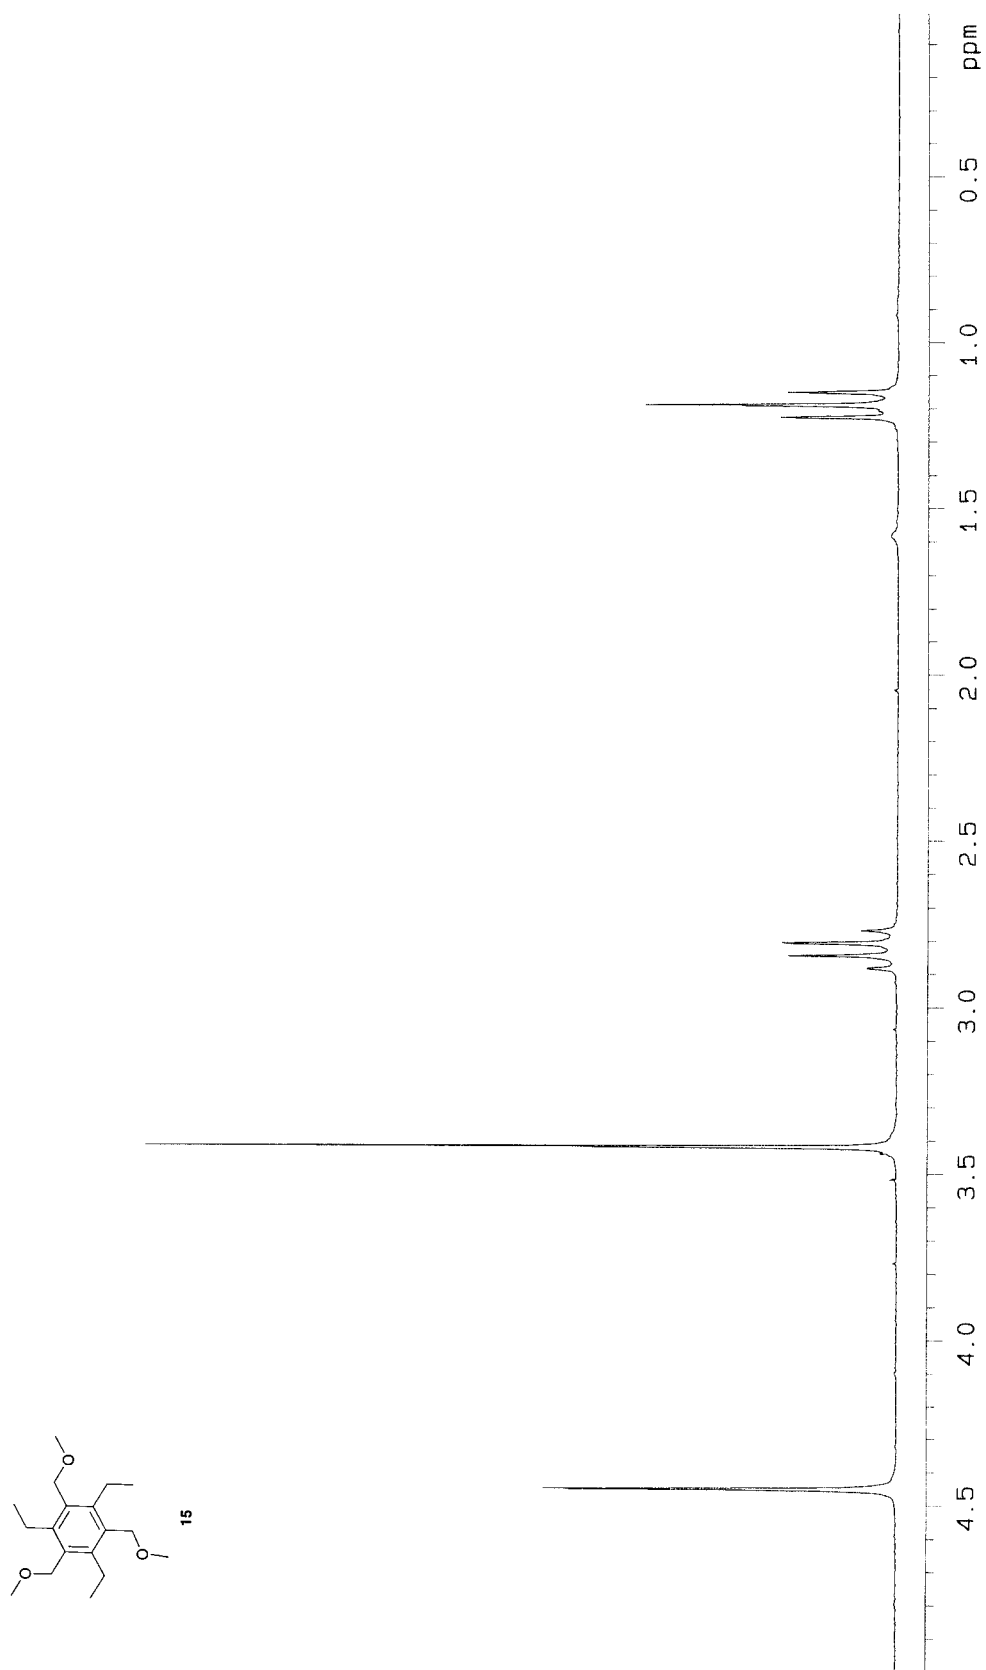

**Figure S7:** <sup>1</sup>H-NMR spectrum (200 MHz) of **15** in CDCl<sub>3</sub>



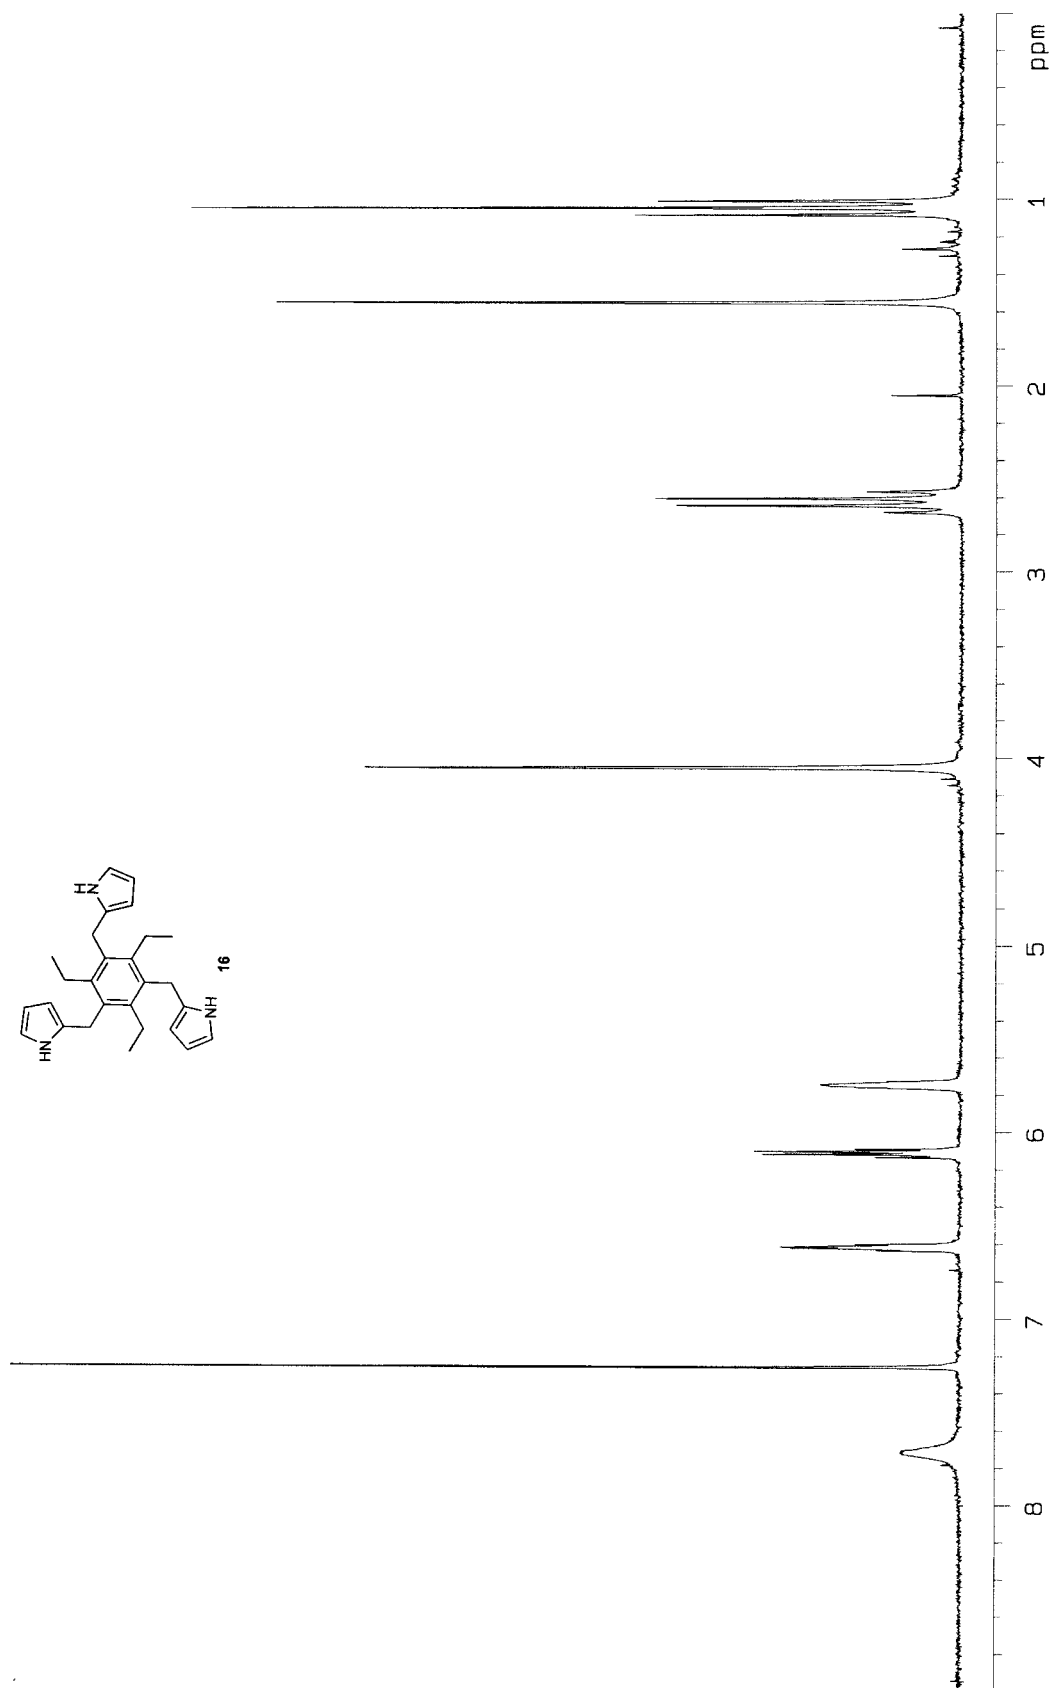

**Figure S8:** <sup>1</sup>H-NMR spectrum (200 MHz) of **16** in CDCl<sub>3</sub>

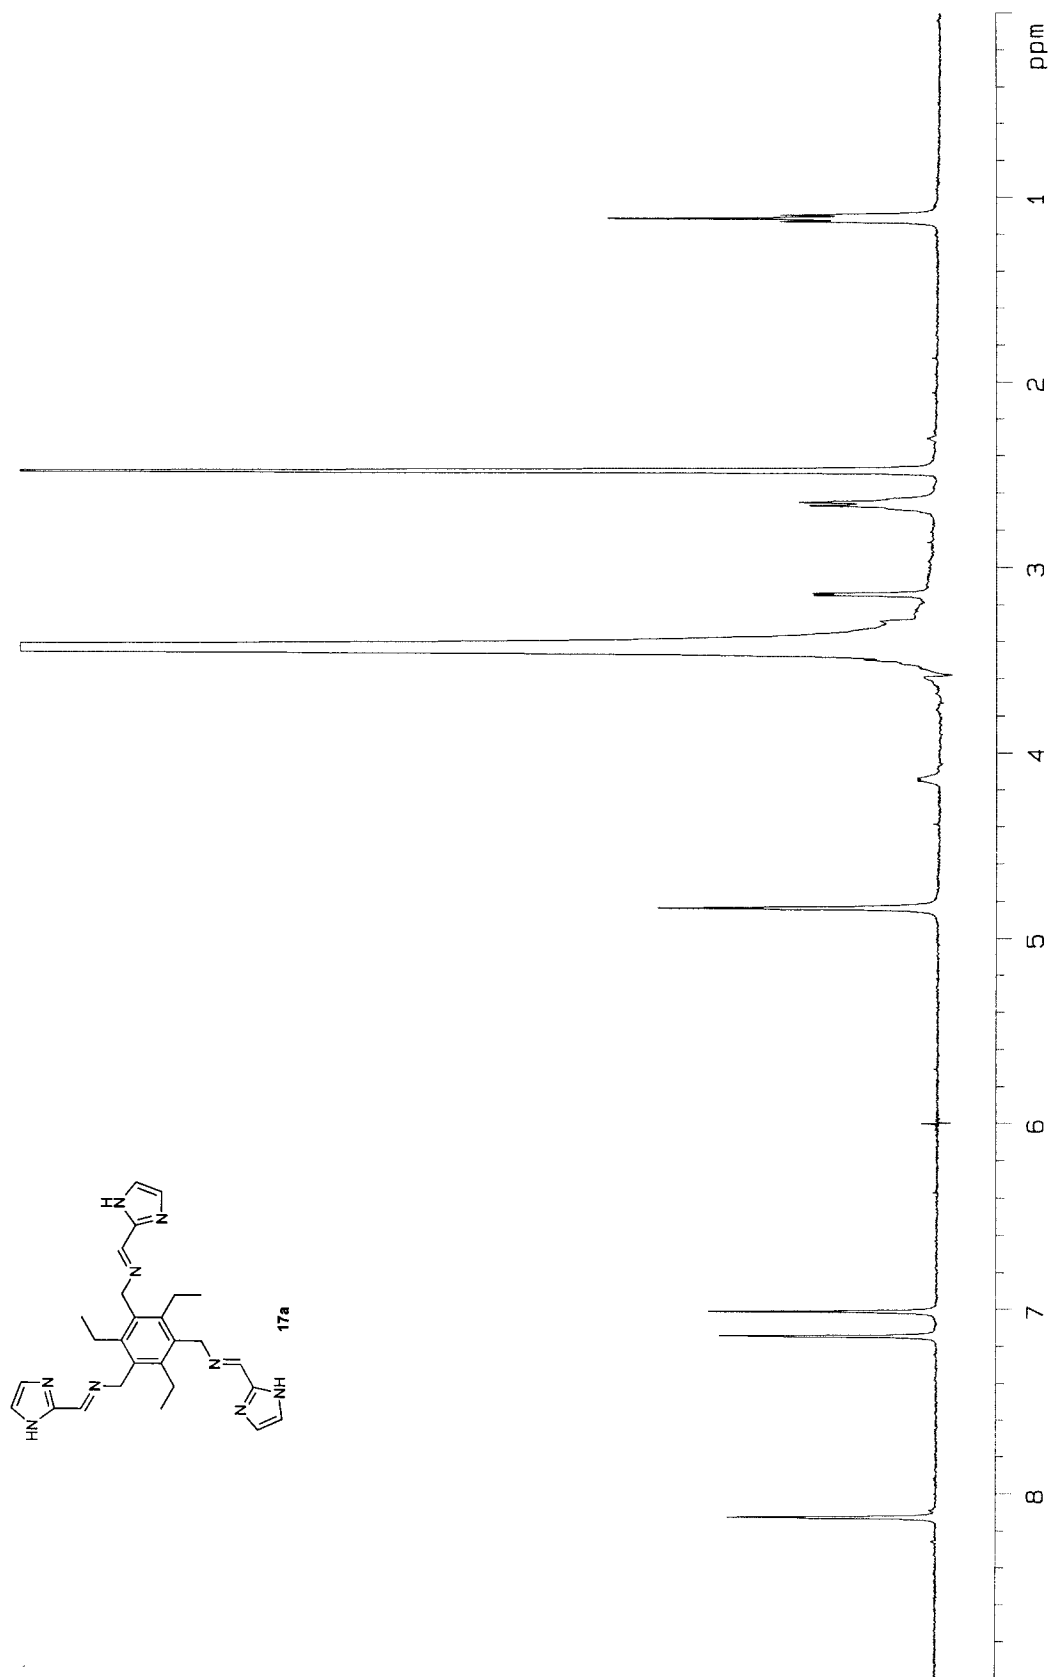

**Figure S9:** <sup>1</sup>H-NMR spectrum (400 MHz) of **17a** in DMSO-d<sub>6</sub>

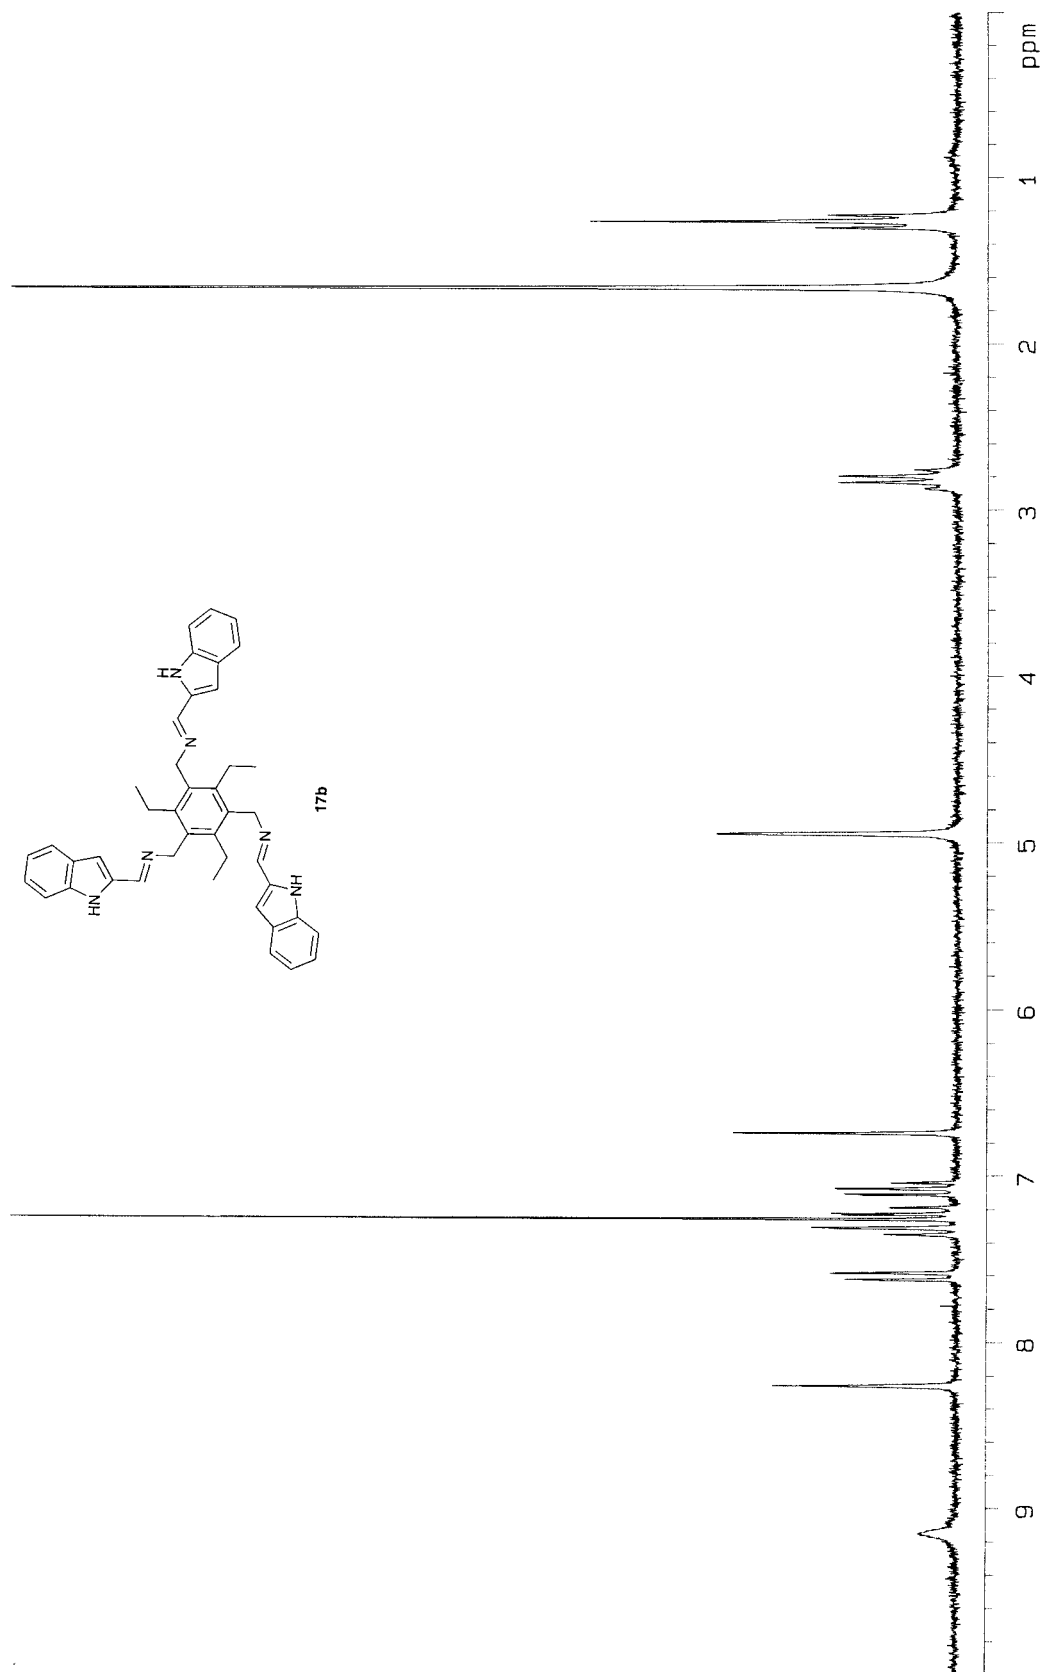

**Figure S10:**  $^1\text{H-NMR}$  spectrum (200 MHz) of **17b** in  $\text{CDCl}_3$

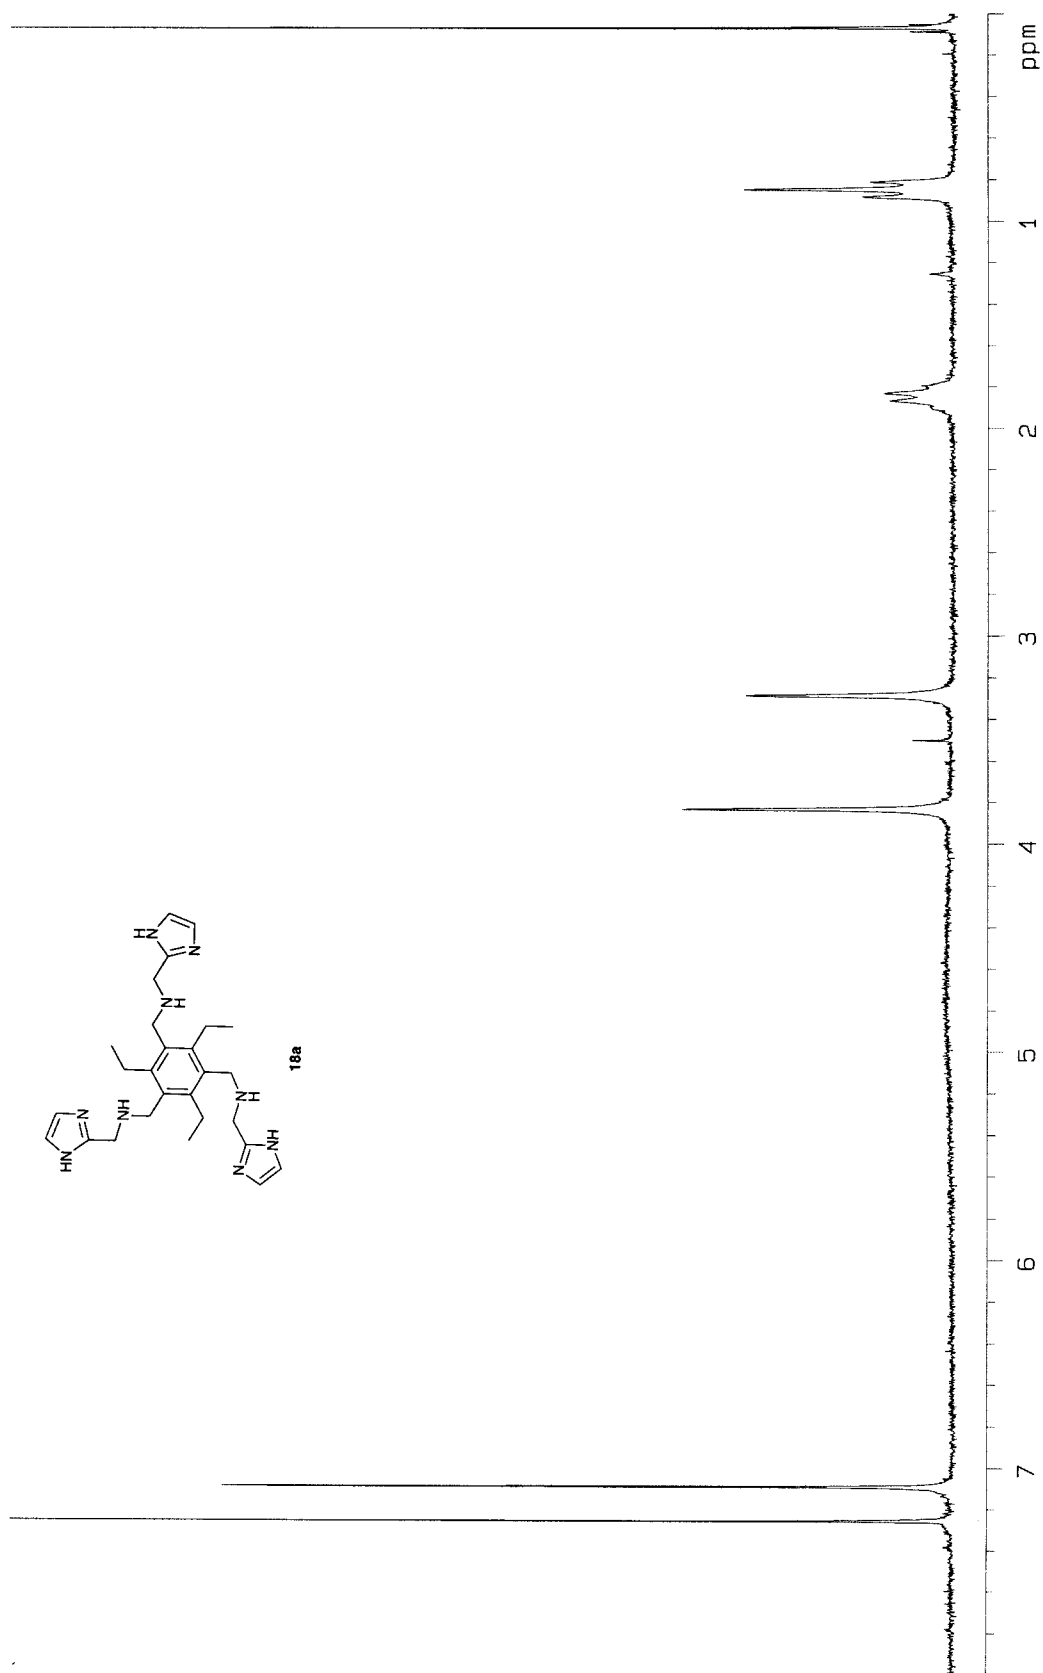

**Figure S11:** <sup>1</sup>H-NMR spectrum (200 MHz) of **18a** in CDCl<sub>3</sub>

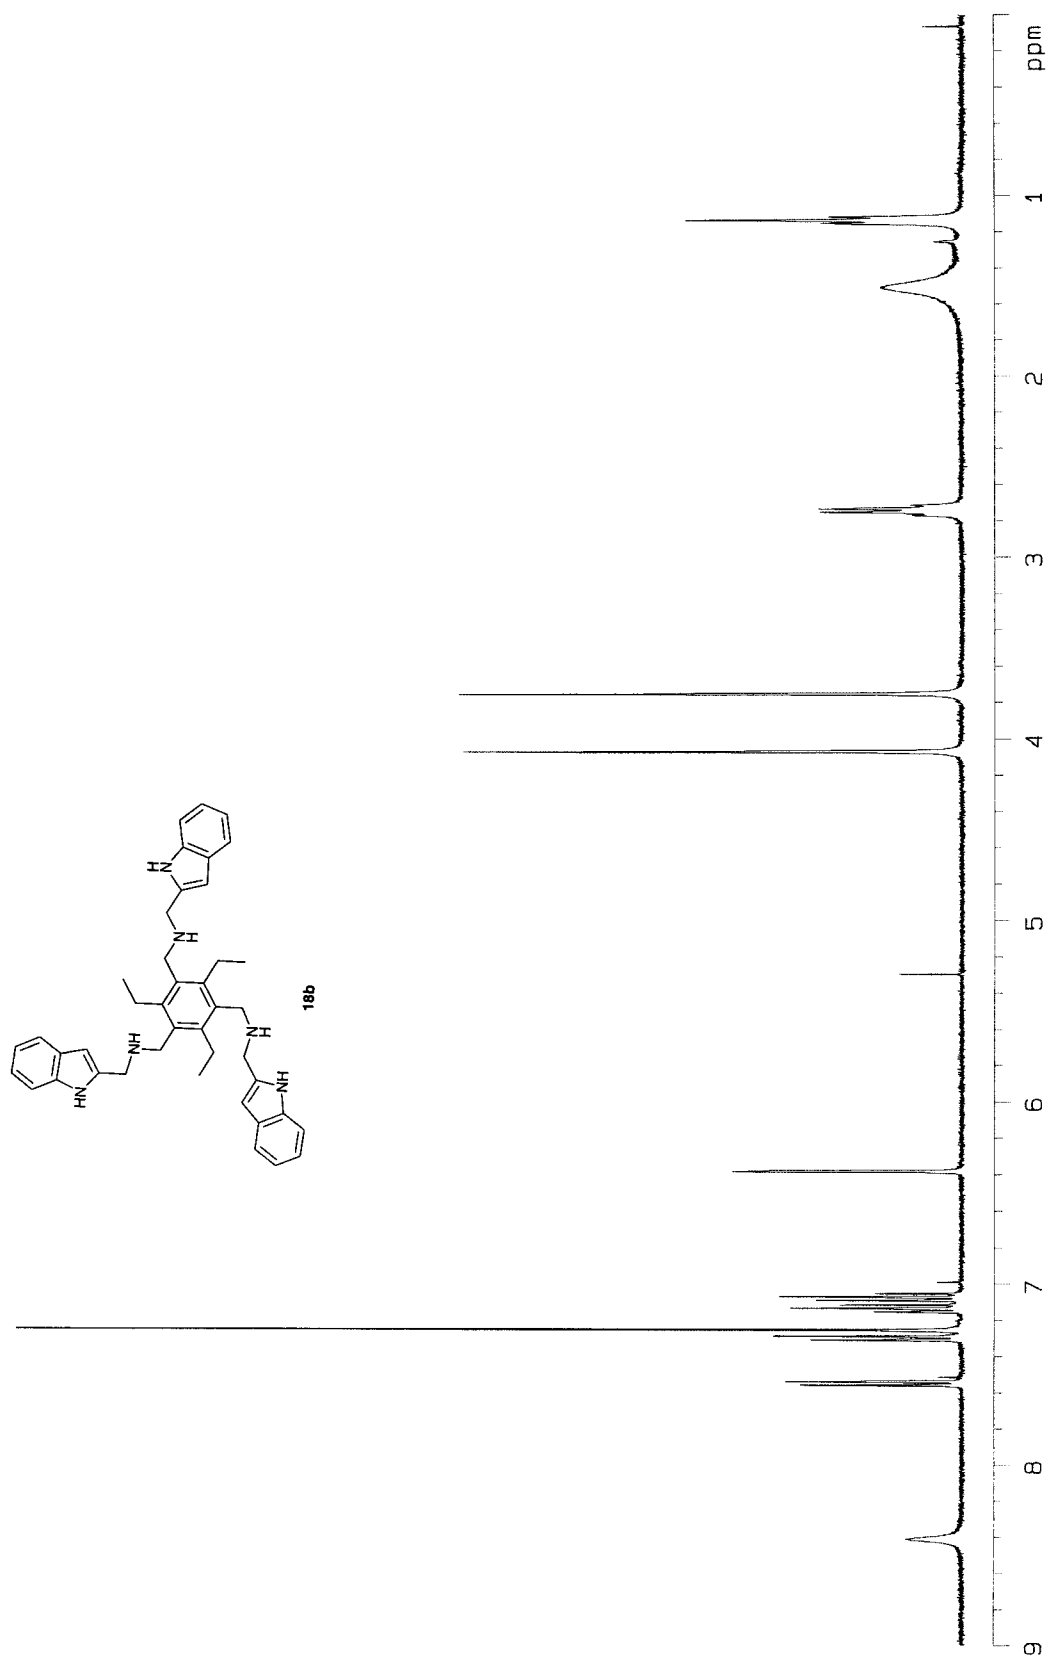

**Figure S12:** <sup>1</sup>H-NMR spectrum (400 MHz) of **18b** 1.9 mM in CDCl<sub>3</sub>

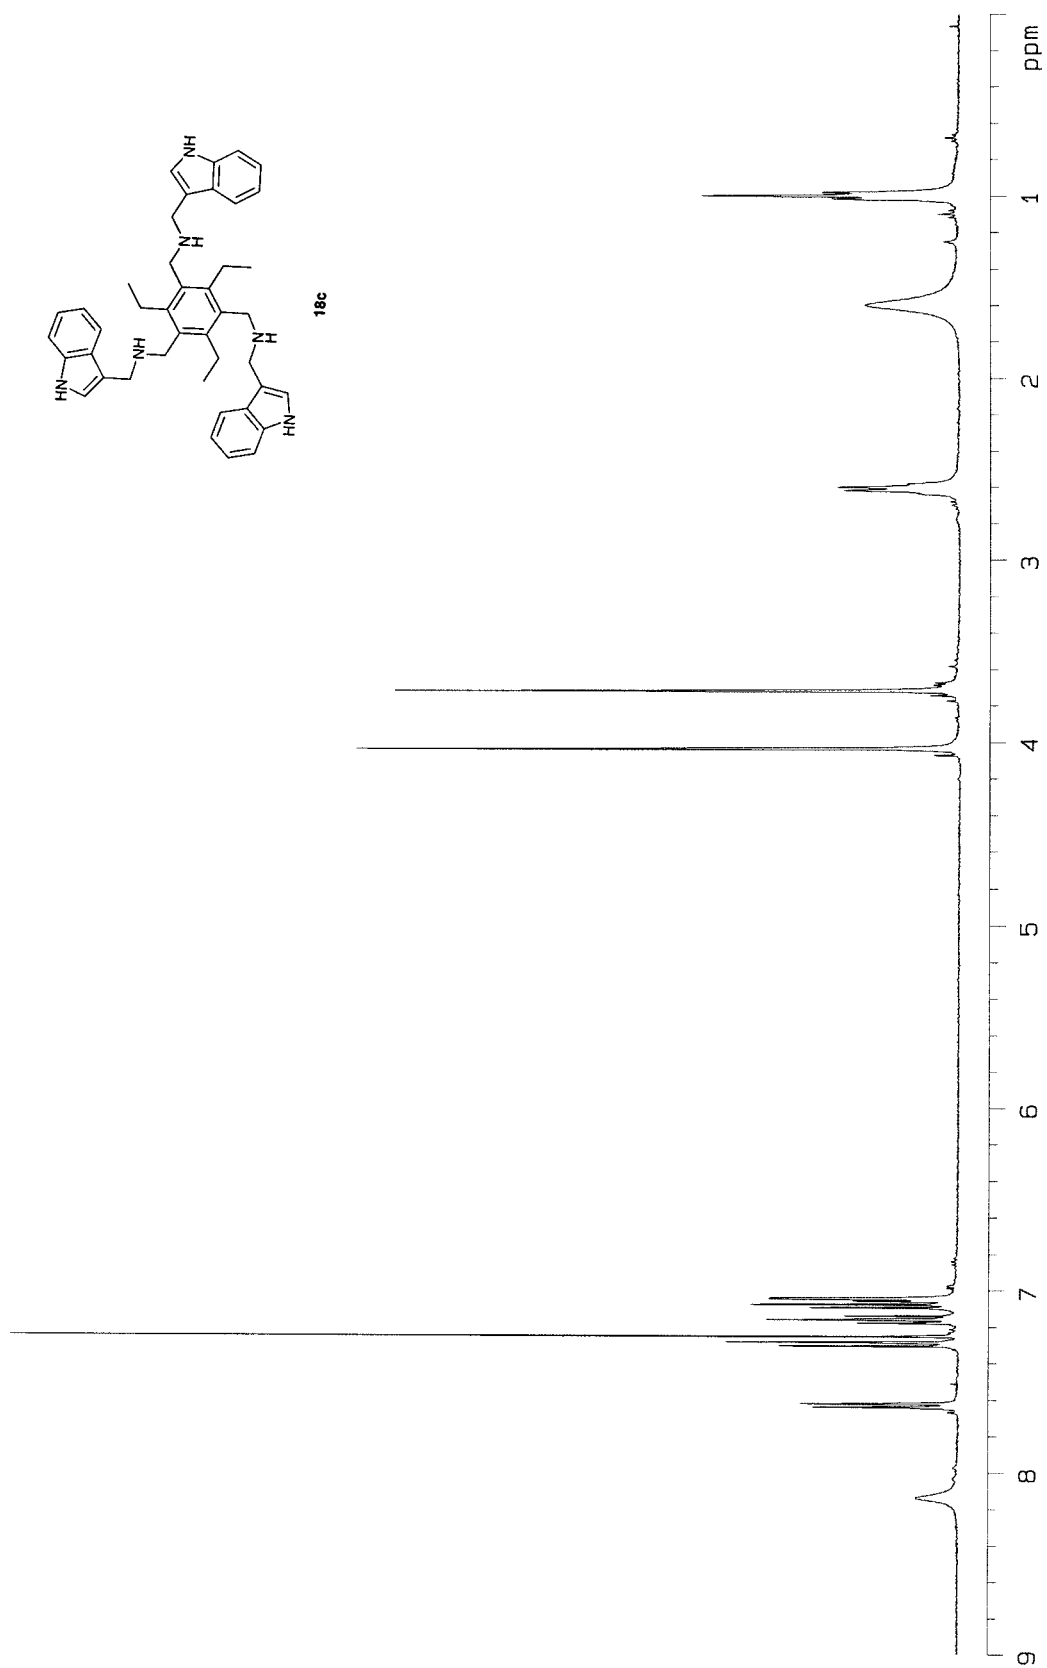

**Figure S13:**  $^1\text{H}$ -NMR spectrum (400 MHz) of **18c** 10 mM in  $\text{CDCl}_3$
